# Supplementary material for: Stability of multiple-rod constructs and dual-rod constructs in cadaveric thoracic spines
Source: Research Square preprint supplement (doi:10.21203/rs.3.rs-8124399/v1), 2025-12-11
Supplement: Supplementary file 1 [file 1b92e4ccf011558f71794189.pdf]

## Supplementary Information

Title: Stability of multiple-rod constructs and dual-rod constructs in cadaveric thoracic spines

Journal: European Spine Journal

Authors: Herrington BJ, Peluso A, Brzozowski P, Cadieux CN and Fernandes RR

Corresponding Author: Brandon J. Herrington, MD, Combined Orthopaedic and Neurosurgical Spine Program, London Health Sciences Centre, Schulich School of Medicine, Room E4-003B, 800 Commissioners Road East, London, Ontario, N6A 5W9, Canada.

e-mail: [brandon.herrington@lhsc.on.ca](mailto:brandon.herrington@lhsc.on.ca)

phone: +1 778-903-6501

fax: +1 519-685-8059

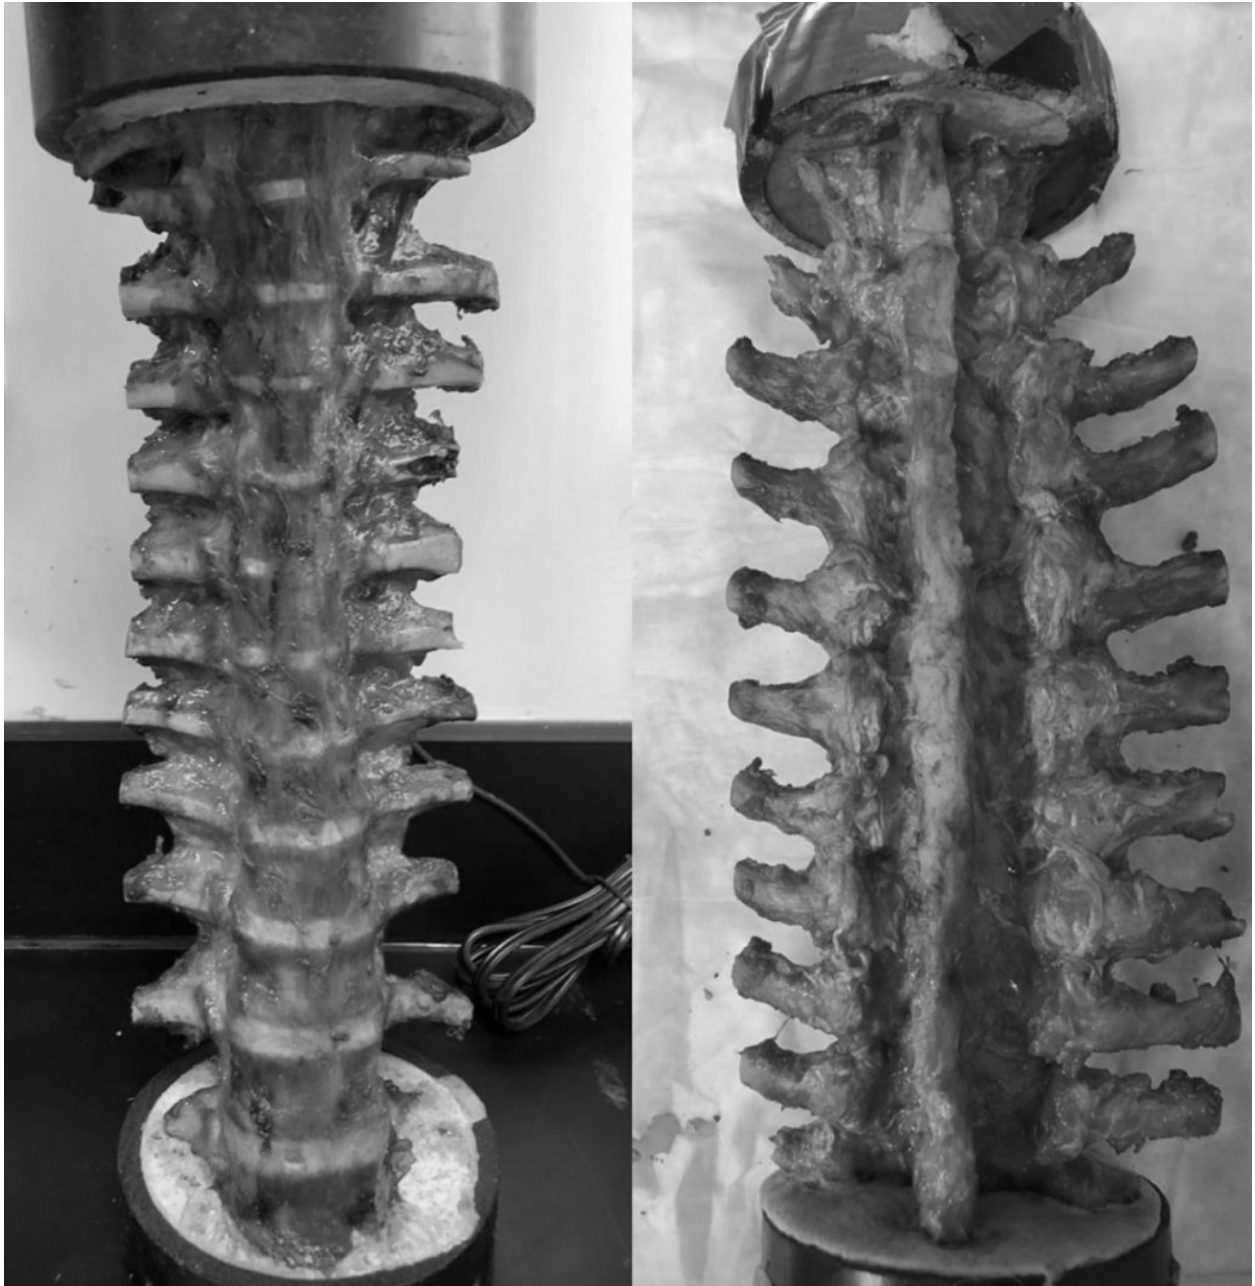

**Online Resource 1** Cadaveric thoracic spines (T1-T12) were sectioned and cleared of any musculature. They were then potted into cement at the cranial (T1) and caudal (T12) ends. The T1-T2 and T11-T12 articulation are free to allow motion

**Online Resource 2** Demographics of cadaveric specimens

| <b>Specimen</b> | <b>Age</b> | <b>Sex</b> | <b>Cause of Death</b> |
|-----------------|------------|------------|-----------------------|
| 1               | 62         | Male       | Respiratory Failure   |
| 2               | 68         | Male       | Respiratory Failure   |
| 3               | 65         | Male       | Cholangiocarcinoma    |
| 4               | 72         | Female     | Paget's Disease       |
| 5               | 71         | Male       | Cardiac Arrest        |
| 6               | 33         | Male       | Head Injury           |
| 7               | 78         | Male       | Lymphoma              |
| 8               | 63         | Female     | Respiratory Failure   |
| 9               | 69         | Male       | Cardiomyopathy        |

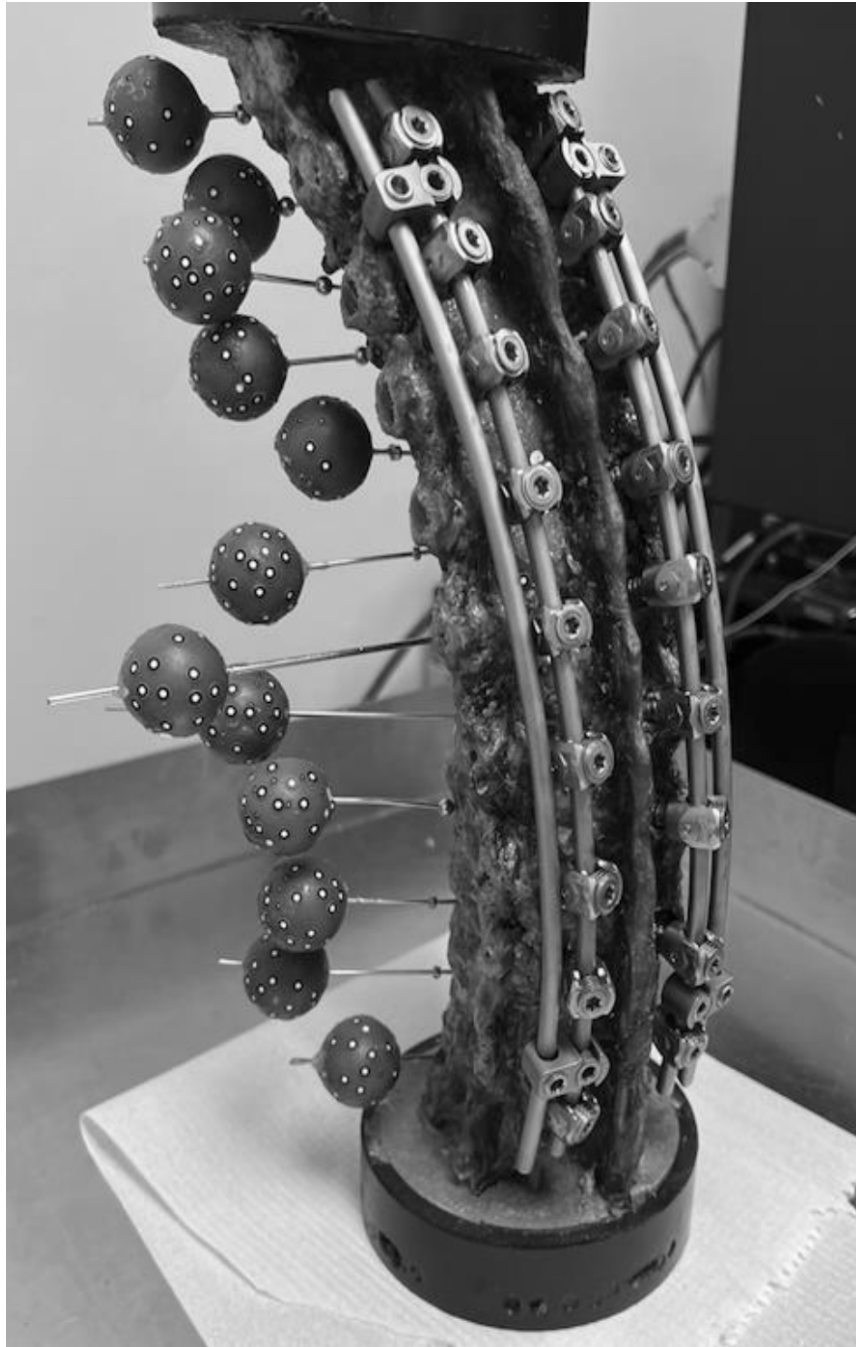

**Online Resource 3** Attachment of markers for digital image correlation system. Twelve 2.0mm K-wires with attached 3D-printed hemispherical plastic components were covered with pre-calibrated black and white stickers to allow tracking from the digital imaging correlation system. One of these markers was inserted into each vertebral body spanning from T1-T12

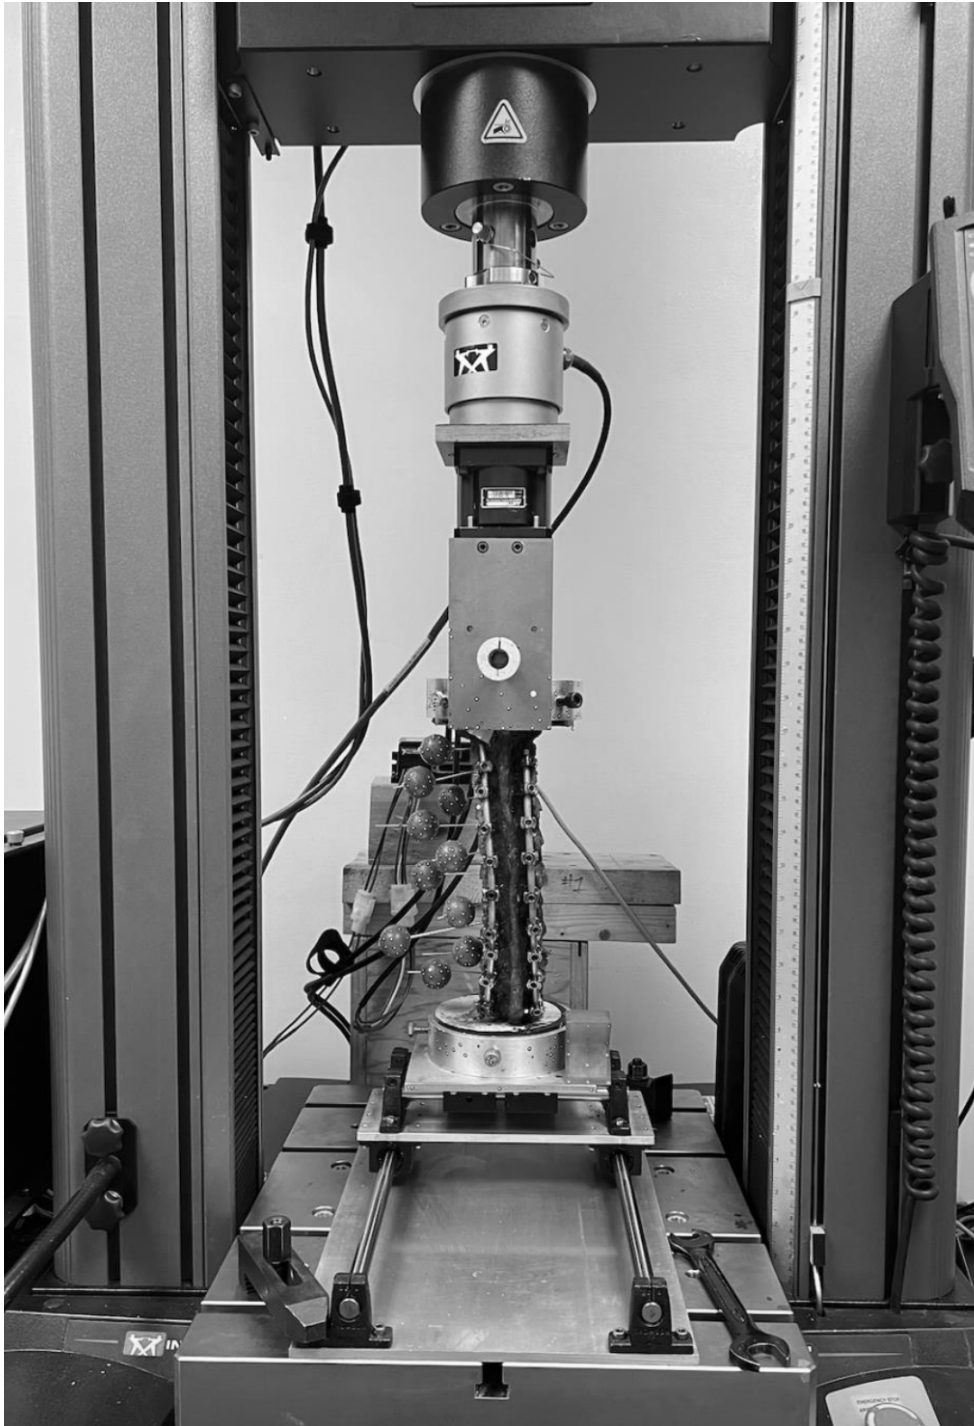

**Online Resource 4** Biomechanical testing set-up used to assess cadaveric specimens. The potted and instrumented spines were mounted onto a custom table-top testing machine and secured at the top and bottom. Various loads were applied in each plane of motion and the optical tracking system monitored motion at the different segments
